# Supplementary material for: Exon junction complex shapes the m6A epitranscriptome
Source: PubMed Central journal article supplement (PMC9780246; doi:10.1038/s41467-022-35643-1), 2022-12-23

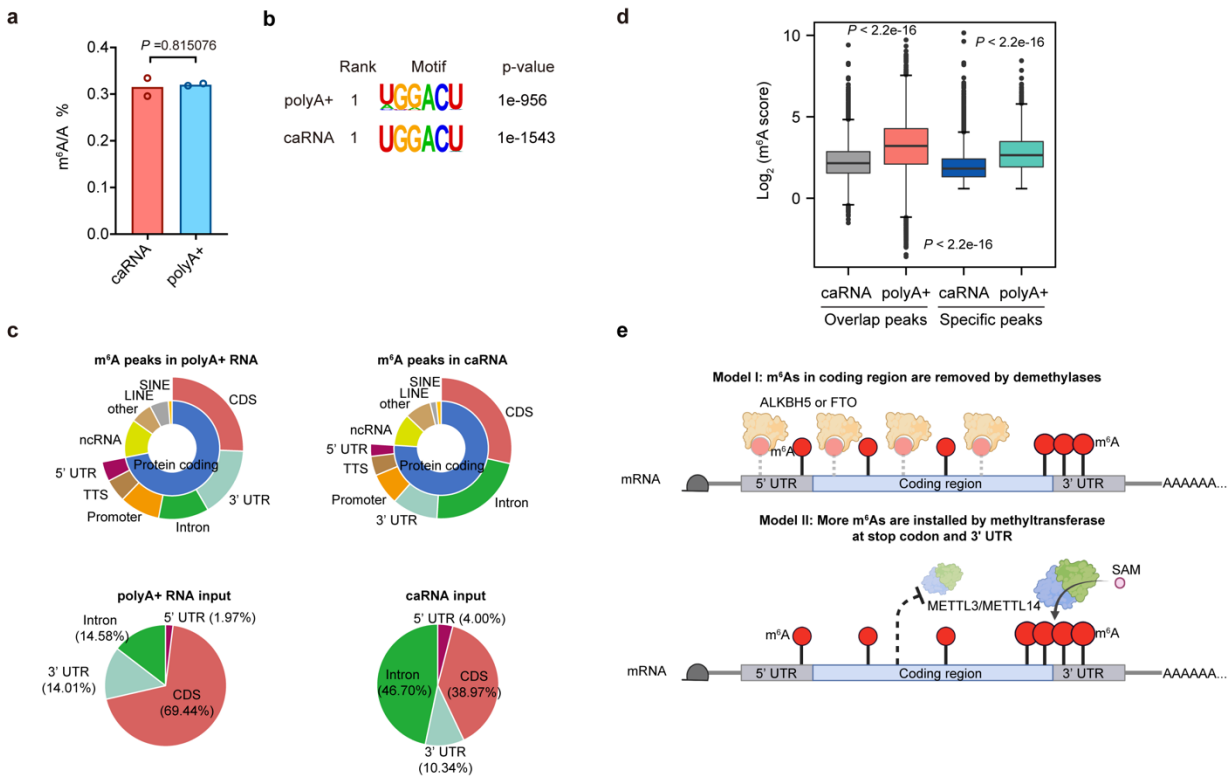

**Supplementary Fig. 1. Dynamic m<sup>6</sup>A modification during mRNA maturation.** **a**, Global m<sup>6</sup>A levels of caRNA and polyA<sup>+</sup> RNA from HeLa cells detected by HPLC-MS/MS. Data are mean  $\pm$  s.d. Statistics: unpaired, two-tailed t-test.  $n = 2$  independent experiments. Source data are provided as a Source Data file. **b**, Consensus motif of m<sup>6</sup>A sites in caRNA and polyA<sup>+</sup> RNA identified by HOMER motifs software. **c**, The distribution of m<sup>6</sup>A peaks (upper) and reads (lower) in caRNA and polyA<sup>+</sup> RNA. **d**, m<sup>6</sup>A enrichment of overlap and specific peaks of caRNA and polyA<sup>+</sup> RNA. Solid line represents median, with whiskers indicating minimum and maximum value.  $n = 9,942; 9,942; 16,758; 7,766$ . Statistical analyses, unpaired two-tailed Student's t-test. **e**, Possible models contributing to the distinct m<sup>6</sup>A distribution observed in mature RNA. Created with BioRender.com.

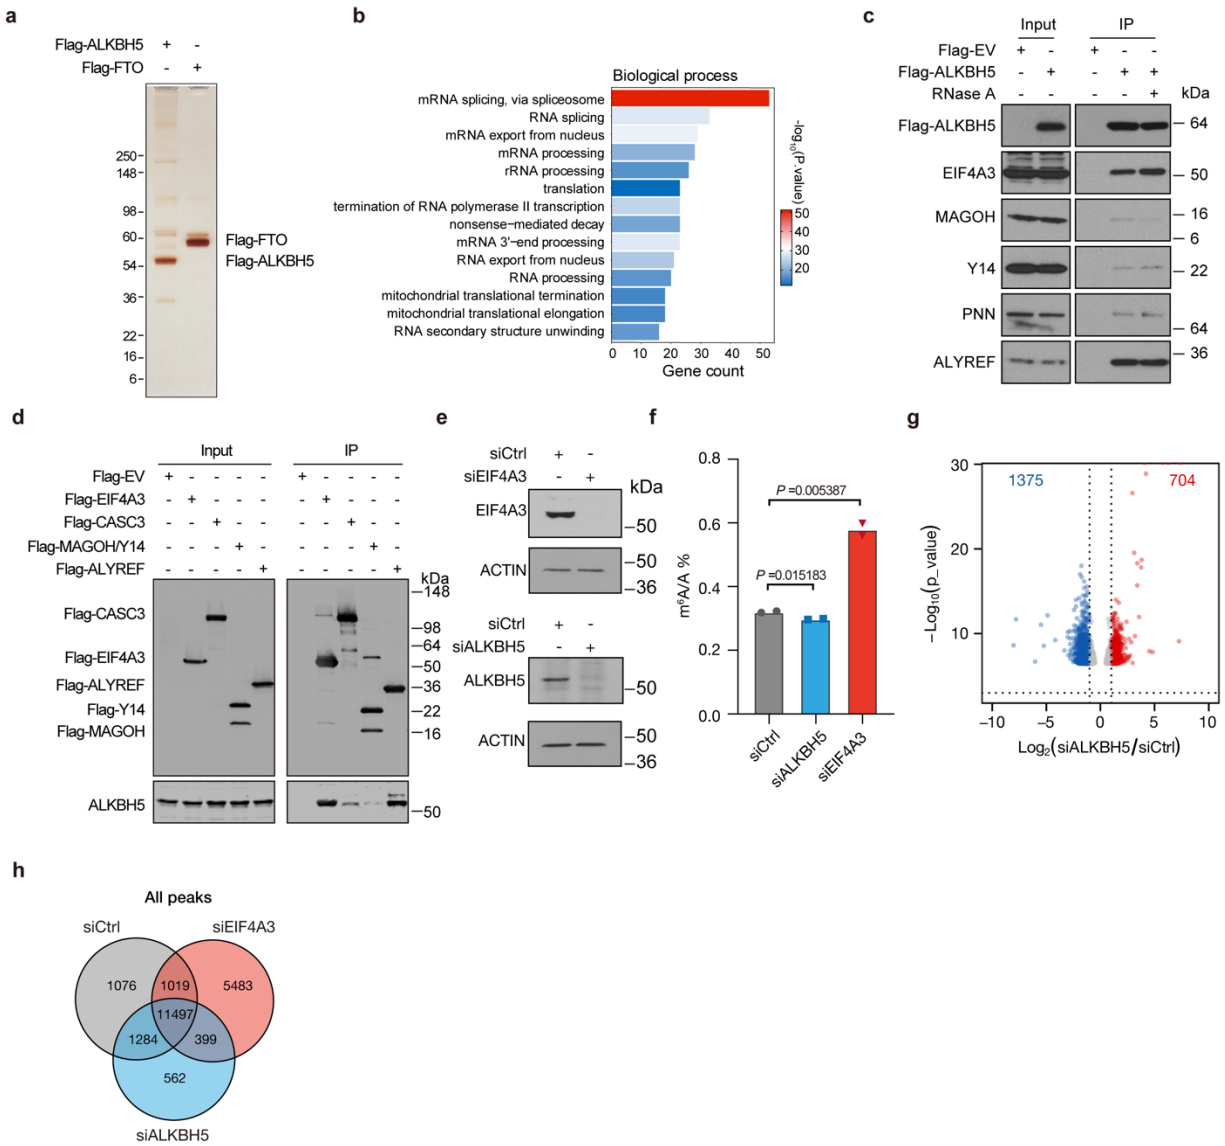

## Supplementary Fig. 2. m<sup>6</sup>A demethylase ALKBH5 does not substantially influence m<sup>6</sup>A profiles.

**a**, Silver staining showing the immunoprecipitation of Flag-ALKBH5 and Flag-FTO. Two independent experiments were repeated with similar results. **b**, Gene ontology analysis of Flag-ALKBH5 interactome. Additional details for proteins interacted with Flag-ALKBH5 or Flag-FTO are provided in Supplementary Data 1. **c**, Immunoprecipitation validation of Flag-ALKBH5 and endogenous EJC components. Two independent experiments were repeated with similar results. **d**, Immunoprecipitation of Flag-tagged EJC component proteins and endogenous ALKBH5. Two independent experiments were repeated with similar results. **e**, West-blot showing the knockdown efficiency of EIF4A3 and ALKBH5. ACTIN is used as the loading control. Two independent experiments were repeated with similar results. **f**, Global m<sup>6</sup>A

levels of polyA<sup>+</sup> RNA from siCtrl, siEIF4A3, and siALKBH5 HeLa cells detected by HPLC-MS/MS. Data are mean  $\pm$  s.d. Statistics: unpaired, two-tailed t-test. n = 2 independent experiments. Source data are provided as a Source Data file. **g**, Volcano plot showing the differential m<sup>6</sup>A regions upon ALKBH5 depletion. **h**, Venn diagram showing the overlap of m<sup>6</sup>A peaks identified in polyA<sup>+</sup> RNA from siCtrl, siEIF4A3, and siALKBH5 HeLa cells.

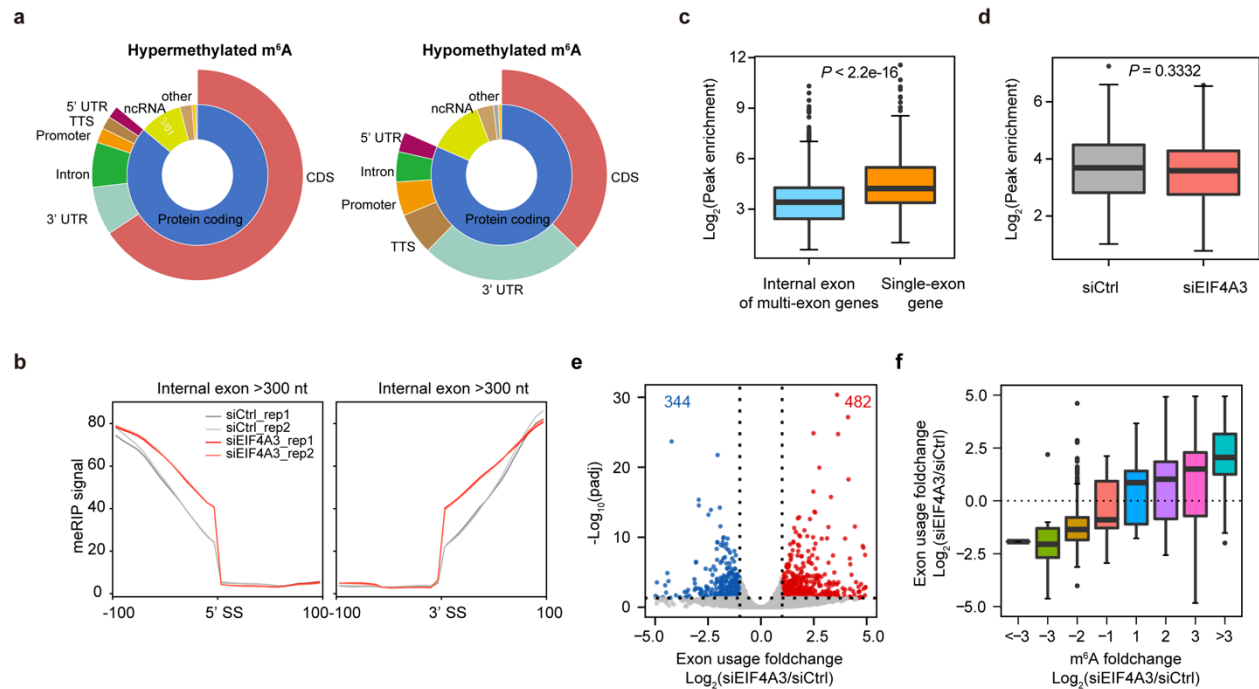

**Supplementary Fig. 3. EIF4A3 depletion increases m<sup>6</sup>A modification near splice junctions and promotes exon inclusion.** **a**, Distribution of hypermethylated m<sup>6</sup>A and hypomethylated m<sup>6</sup>A upon EIF4A3 depletion. **b**, Aggregation plots showing m<sup>6</sup>A enrichment near splice junctions of long internal exons. **c**, The m<sup>6</sup>A peak enrichment of internal exons of multi-exon genes and single-exon genes. Solid line represents median, with whiskers indicating minimum and maximum value.  $n = 1,279; 279$ . Statistical analyses, unpaired two-tailed Student's t-test. **d**, The m<sup>6</sup>A peak enrichment of single-exon genes in siCtrl (grey) and siEIF4A3 (red). Solid line represents median, with whiskers indicating minimum and maximum value.  $n = 161; 148$ . Statistical analyses, unpaired two-tailed Student's t-test. **e**, Differential exon usage upon EIF4A3 depletion. Red dots represent upregulated exons; Blue dots represent downregulated exons. **f**, Positive correlation between m<sup>6</sup>A foldchange and exon usage foldchange upon EIF4A3 depletion. Solid line represents median, with whiskers indicating minimum to maximum value.  $n = 1; 9; 91; 34; 26; 169; 124; 64$ . Statistical analyses, unpaired two-tailed Student's t-test.

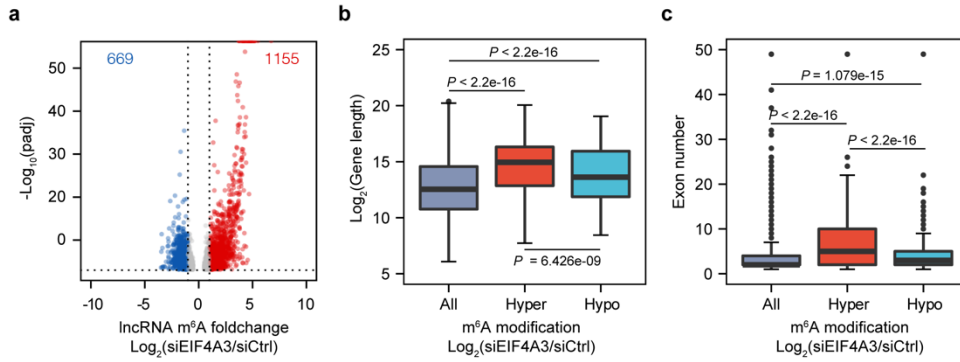

**Supplementary Fig. 4. Depletion of EIF4A3 increases m<sup>6</sup>A modification of lncRNAs.** **a.** Differential m<sup>6</sup>A modifications on lncRNAs upon EIF4A3 depletion. R Red dots represent increased m<sup>6</sup>A regions (hypermethylated m<sup>6</sup>A), Blue dots present decreased m<sup>6</sup>A regions (hypomethylated m<sup>6</sup>A). **b.** The length of all, hypermethylated or hypomethylated lncRNAs. Solid line represents median, with whiskers indicating minimum to maximum values. n = 17,740; 1,155; 669. **c.** The exon number of all, hypermethylated or hypomethylated lncRNAs. Solid line represents median, with whiskers indicating minimum to maximum values. n = 17,740; 1,155; 669. **d.** Boxplot showing the expression foldchange of lncRNAs with unchanged, hypermethylated, and hypomethylated m<sup>6</sup>A regions. Solid line represents median, with whiskers indicating minimum to maximum values. Statistical analyses, unpaired two-tailed Student's t-test.

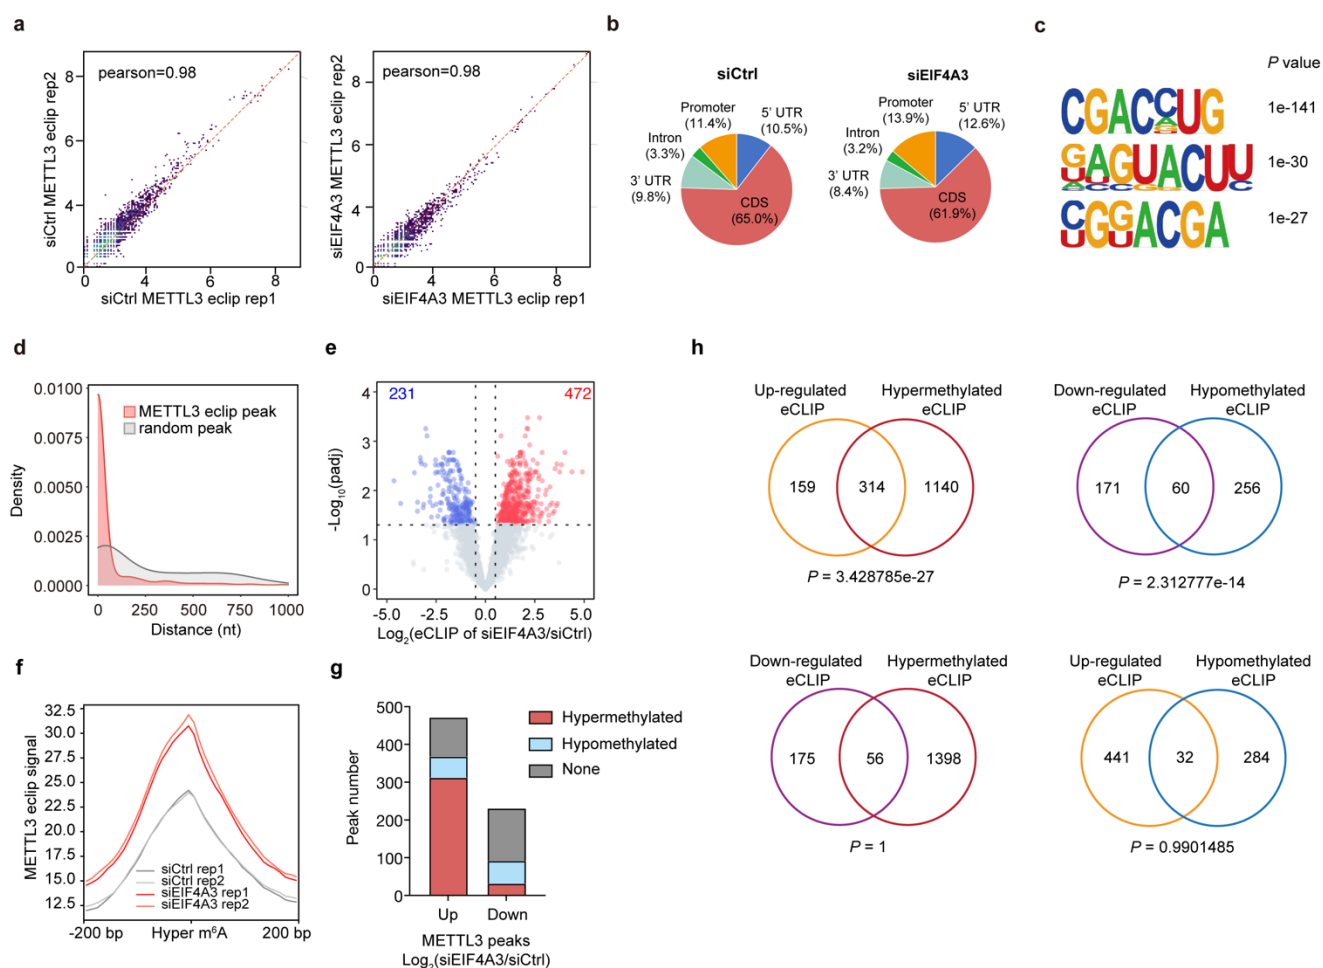

**Supplementary Fig. 5. EIF4A3 inhibits METTL3 binding.** **a**, Scatterplot showing the high reproducibility of METTL3 eCLIP-seq in siCtrl and siEIF4A3 cells. **b**, METTL3 binding peak distribution in siCtrl and siEIF4A3 cells. **c**, Top consensus motifs of METTL3 binding peaks identified by HOMER motifs software. **d**, Distribution of distance between m<sup>6</sup>A sites and METTL3 binding peaks or random peaks. **e**, Differential METTL3 binding peaks upon EIF4A3 depletion. **f**, Average distribution of METTL3 eCLIP-seq signal is shown, aligned around the center of hypermethylated m<sup>6</sup>A. **g**. The number of increased and decreased METTL3 peaks with hypermethylation or hypomethylated m<sup>6</sup>A regions. **h**. Venn plots showing the correlation between differential binding and differential methylated METTL3-eCLIP peaks. *P* values are calculated with hypergeometric test.

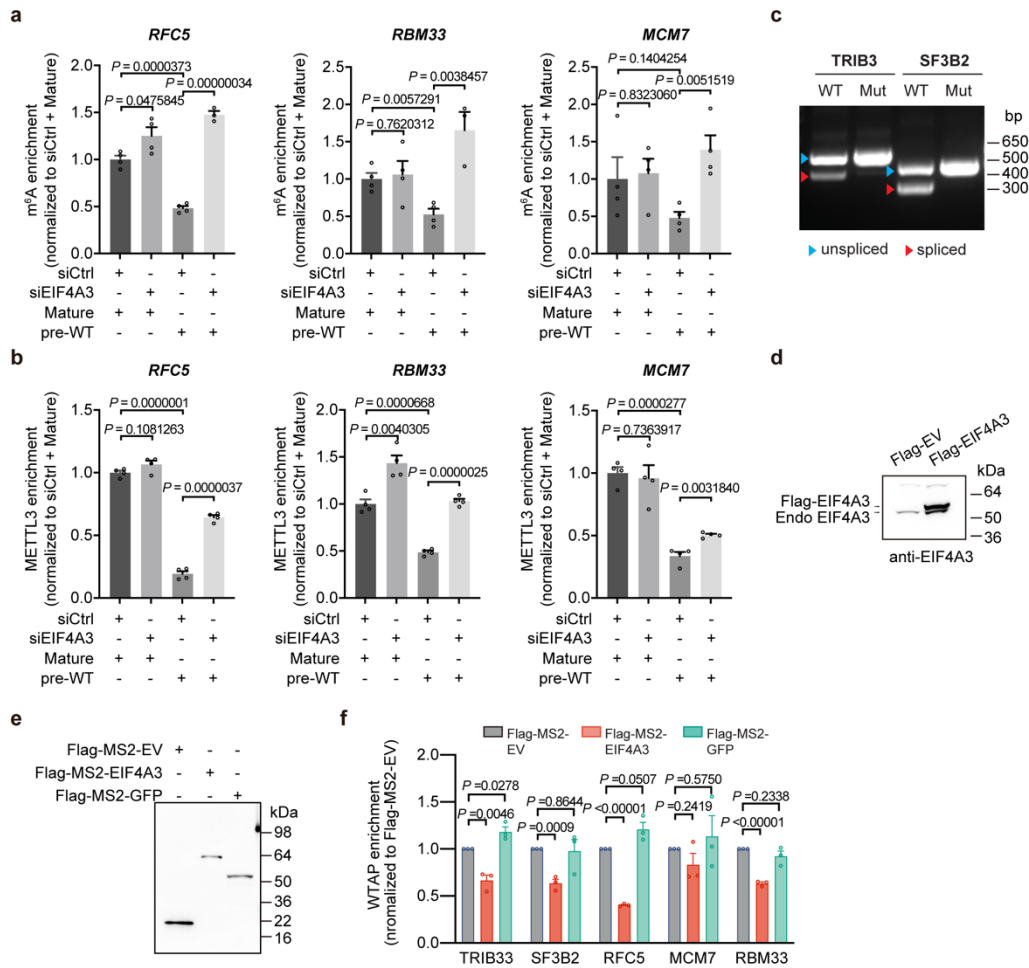

**Supplementary Fig. 6. Exon junction complex blocks METTL3-mediated m<sup>6</sup>A modification of spliced mRNAs.** **a,b**, meRIP-qPCR (**a**) and METTL3 CLIP-qPCR (**b**) analysis of reporter constructs showing m<sup>6</sup>A and METTL3 enrichment upon EIF4A3 KD. Data are mean  $\pm$  S.E.M. of three independent experiments. Statistical analyses, two-tailed Student's t-test. **c**, analysis of GU/AG splicing defective pre-Mut reporters. Blue triangle indicates the unspliced precursor reporter. Red triangle indicates the spliced reporter. Two independent experiments were repeated with similar results. **d**, Western blotting showing the Flag-tagged and endogenous EIF4A3. Two independent experiments were repeated with similar results. **e**, Western blot showing the expression of Flag-MS2-EV, Flag-MS2-EIF4A3, and Flag-MS2-GFP. Two independent experiments were repeated with similar results. **f**, WTAP CLIP-qPCR analysis of tethering reporter constructs showing WTAP enrichment upon MS2 tagged EV, EIF4A3 or

GFP overexpression. Data are mean  $\pm$  S.E.M. of three independent experiments. Statistical analyses, two-tailed Student's t-test. Source data are provided as a Source Data file.



**Supplementary Table 1. Splicing related proteins interacted with ALKBH5**

| Complex     | Class / family              | Gene Symbol   | Peptide of ALKBH5 IP | of | Peptide of FTO IP |
|-------------|-----------------------------|---------------|----------------------|----|-------------------|
| spliceosome | PRP19 related               | XAB2          | 20                   |    | 0                 |
|             | PRP19 related               | SNW1          | 11                   |    | 0                 |
|             | Second step factors         | DHX8          | 14                   |    | 0                 |
|             | U1 snRNP                    | SNRNP70       | 7                    |    | 0                 |
|             | U2 snRNP                    | SF3A3         | 6                    |    | 0                 |
|             | U4/U6                       | SART3         | 20                   |    | 0                 |
|             | U4/U6 snRNP                 | PRPF4B        | 14                   |    | 0                 |
|             | U4/U6 snRNP                 | PRPF4         | 14                   |    | 0                 |
|             | U4/U6 snRNP                 | PRPF3         | 13                   |    | 0                 |
|             | U5 snRNP                    | SNRNP40       | 6                    |    | 0                 |
|             | U5 snRNP                    | DDX23         | 10                   |    | 0                 |
|             |                             | AQR           | 28                   |    | 0                 |
|             |                             | PLRG1         | 6                    |    | 0                 |
|             |                             | CRNKL1        | 8                    |    | 0                 |
|             |                             | PPIE          | 7                    |    | 0                 |
|             |                             | CWC22         | 10                   |    | 0                 |
|             |                             | DHX16         | 13                   |    | 0                 |
|             |                             | CDC40         | 6                    |    | 0                 |
|             |                             | DDX41         | 6                    |    | 0                 |
|             |                             | CACTIN        | 6                    |    | 0                 |
|             | SLU7                        | 7             |                      | 0  |                   |
|             | U2AF65 associated           | DDX39B        | 2                    |    | 0                 |
|             | alternative splicing factor | PTBP1         | 7                    |    | 0                 |
| EJC/mRNP    | EJC/mRNP                    | RBM8A         | 26                   |    | 2                 |
|             | EJC/mRNP                    | EIF4A3        | 120                  |    | 0                 |
|             | EJC/mRNP                    | CASC3         | 89                   |    | 0                 |
|             | EJC/mRNP                    | PNN           | 129                  |    | 0                 |
|             | EJC/mRNP                    | ALYREF        | 262                  |    | 3                 |
|             | EJC/mRNP                    | MAGOHB        | 48                   |    | 0                 |
|             | EJC/mRNP                    | RNPS1         | 22                   |    | 0                 |
| hnRNP       | hnRNP                       | RALY          | 10                   |    | 0                 |
|             | hnRNP                       | HNRNPA1       | 43                   |    | 0                 |
|             | hnRNP                       | HNRNPA0       | 8                    |    | 0                 |
|             | hnRNP                       | HNRNPA3       | 8                    |    | 0                 |
|             | hnRNP                       | HNRNPM        | 79                   |    | 0                 |
|             | hnRNP                       | HNRNPA2B1     | 27                   |    | 2                 |
|             | hnRNP                       | HNRNPC        | 36                   |    | 0                 |
|             | hnRNP                       | RBMX (HNRNPG) | 18                   |    | 1                 |

**Supplementary Table 1. Splicing related proteins interacted with ALKBH5 (continued)**

| Complex           | Class / family                    | Gene Symbol | Peptide of ALKBH5 IP | of | Peptide of FTO IP |
|-------------------|-----------------------------------|-------------|----------------------|----|-------------------|
| 3' end processing | CPSF                              | CPSF2       | 6                    |    | 0                 |
|                   | pre-mRNA/mRNA binding proteins    | PABPN1      | 30                   |    | 1                 |
|                   | pre-mRNA 3'-end-processing factor | FIP1L1      | 8                    |    | 0                 |
|                   |                                   | PABPC1      | 107                  |    | 5                 |
| SR protein        | SR protein                        | SRSF4       | 16                   |    | 0                 |
|                   | SR protein                        | SRSF9       | 8                    |    | 0                 |
|                   | SR protein                        | SRSF1       | 25                   |    | 0                 |
|                   | SR protein                        | TRA2B       | 12                   |    | 0                 |
|                   | SR protein                        | TRA2A       | 7                    |    | 0                 |
|                   | SR protein                        | SRSF10      | 11                   |    | 0                 |
|                   | SR related                        | SRRM1       | 60                   |    | 0                 |
| others            |                                   | NCBP1       | 21                   |    | 0                 |
|                   |                                   | SRRT        | 10                   |    | 0                 |
|                   |                                   | ZCCHC8      | 14                   |    | 0                 |
|                   |                                   | DDX5        | 9                    |    | 0                 |
|                   |                                   | UPF3B       | 16                   |    | 0                 |

**Supplementary Table 2. Primers for plasmid construction.**

| Primer name                 | Primer sequence 5' - 3'                                              |
|-----------------------------|----------------------------------------------------------------------|
| NotI-ALKBH5-f               | aacaaGCGGCCGCCAGCGGCTAC                                              |
| EcoRI-ALKBH5-r              | aacaagatataTCAGTGCCGCCGCATCTTCACCTTTCGGGCAGGG<br>CTGCCTGCTGCCTCAGAGC |
| Clal-EIF4A3-f               | aacaaATCGATaGCGACCACGGCCACGATG                                       |
| XbaI-EIF4A3-r               | aacaaTCTAGAAaTCAGATAAGATCAGCAACGTTTCATCGGCATCT<br>C                  |
| Clal-MAGOH-f                | aacaaATCGATaGAGAGTGACTTTTATCTGCGTTACTAC                              |
| XbaI-MAGOH-r                | aacaaTCTAGACTAGATTGGTTTAATCTTGAAGTGTAATCCA                           |
| Clal-Y14-f                  | aacaaATCGATaGCGGACGTGCTAGATCTTCACGAGGCTG                             |
| XbaI-Y14-r                  | aacaaTCTAGAAaTCAGCGACGTCTCCGGTCTGGACTTC                              |
| Clal-CASC3-f                | aacaaATCGATaGCGGACCGGCGGCGGCAG                                       |
| XbaI-CASC3-r                | aacaaTCTAGATTAaACTGGAACCCCTGCTTACAACCTCAGGTG<br>GAGGGGGCTTGATG       |
| Clal-ALYREF-f               | aacaaATCGATaCCCGATTCCGCGCCCGCCATGG                                   |
| XbaI-ALYREF-r               | aacaaTCTAGATTAaACTGGTGTCCATTCTCGCATTATAGGCGTC<br>CAGCTGGGCATCC       |
| Globin_Sall_insert_f        | gtcgacGCTTCCCACCAACAAGA                                              |
| pre_Globin_Sall_insert_r    | GCTAGCAAACATCCTGGGAGA                                                |
| Globin_Sall_insert_r        | GCTAGCAAACATCCTTTCCAG                                                |
| pre_Globin_HindIII_insert_f | aagcttGTCAACTTCAAGGTATGCGCTGG                                        |
| Globin_HindIII_insert_r     | GGGATCCACACGCAGCTT                                                   |
| Globin_HindIII_insert_f     | aagcttGTCAACTTCAAGCTCCTGAGC                                          |
| RFC5-exon9-f                | GCGTCGACAGCACCAATATGGCCTTTG                                          |
| RFC5-exon9-r                | CCCAAGCTTTTCTGTAGGCTGTGGTGAA                                         |
| TRIB3-exon2-f               | GCGTCGACATGCGAGCCACCCCTC                                             |
| TRIB3-exon2-r               | CCCAAGCTTCTTGAGGTATACTCAGTGCC                                        |
| MCM7-exon11-f               | GCGTCGACGCCAGTACACAACAGGCC                                           |
| MCM7-exon11-r               | CCCAAGCTTCGTAGGTCATTGTCTCGG                                          |
| SNRPA-exon3-f               | GCGTCGACCGTATCCAGTATGCCAAGACC                                        |
| SNRPA-exon3-r               | CCCAAGCTTCGGGACAGGCCCTG                                              |
| RBM33-exon9-f               | GCGTCGACACTCATTCTCCAAGGTTAATTCCT                                     |
| RBM33-exon9-r               | CCCAAGCTTCTTGAACAGGCGTGACCA                                          |
| SF3B2-exon10-f              | GCGTCGACAAAAACCGGAAGCGTAGG                                           |
| SF3B2-exon10-r              | CCCAAGCTTCTTAAAAGCCTCAAAGATCCTCT                                     |
| reporter_MS2_insert_f       | actctagaaaacatgaggatcaccatgtTGAAAGGATGTTTGCTAG                       |
| reporter_MS2_insert_r       | cgacctgcagacatgggtgatcctcatgtGGGCTTCAGCTCCATATTC                     |
| NotI-MS2-tag-f              | GCGGCCGCAGCTTCTAACTTTACTCAGTTCCG                                     |
| Clal-MS2-tag-r              | GCTATCGATTTGCCGGAGTTTGCTGCG                                          |
| intron1_GU2AC-f             | CCCTGGAAAGacGAGAACAGGAC                                              |
| intron1_GU2AC-r             | gtcctgttctcgtctttccaggg                                              |

|                 |                          |
|-----------------|--------------------------|
| intron1_AG2TC-f | TCCTTCTCCCtcGATGTTTGCTAG |
| intron1_AG2TC-r | CTAGCAAACATCgaGGGAGAAGGA |
| intron2_GU2AC-f | CAACTTCAAGacATGCGCTGGG   |
| intron2_GU2AC-r | CCCAGCGCATgtCTTGAAGTTG   |
| intron2_AG2TC-f | TTGTCTCCGctcCTCCTGAGCCAC |
| intron2_AG2TC-r | GTGGCTCAGGAGgaGCGGAGACAA |

**Supplementary Table 3. Primers for qPCR assays.**

| Primer name    | Primer sequence 5' - 3'              |
|----------------|--------------------------------------|
| RFC5-endo-f    | CAGTGGAGACATGCGTAGGG                 |
| RFC5-endo-r    | AATGTCTGACTTGAGCGGGT                 |
| TRIB3-endo-f   | CAGATCGTGCAACTGCTGTG                 |
| TRIB3-endo-r   | GTACCAGCCAGGACCTCAGT                 |
| MCM7-endo-f    | ATCCGGGGCAACATCAACAT                 |
| MCM7-endo-r    | GGTCAGTTCTCCACTCACGG                 |
| RBM33-endo-f   | ACGACCAATCTGGAGAACAGG                |
| RBM33-endo-r   | CTGGGGAGGCATGTGCATT                  |
| SF3B2-endo-f   | TCAGCGTCAGAGACTGAGGA                 |
| SF3B2-endo-r   | CCGGGTTGAGTCTTTCTCCC                 |
| SNRPA-endo-f   | CTCCATGCAGGGTTTCCCTT                 |
| SNRPA-endo-r   | CTCCACGAAGGTGCCTTTCA                 |
| PHGDH-endo-f   | TGCGGAAAGTGCTCATCAGT                 |
| PHGDH-endo-r   | CCCACCACCTGGAGTTTCTC                 |
| HCFC1-endo-f   | CACCACCCTCATGGTAACGG                 |
| HCFC1-endo-r   | TCCTGCTGTGTCAGCACAAT                 |
| Globin_f       | cgtcagatccgctaggatgggtgctctctggggaag |
| RFC5-exon9-r   | CCCAAGCTTTTCTGTAGGCTGTGGTGAA         |
| TRIB3-exon2-r  | CCCAAGCTTCTTGACAGGTATACTCAGTGCC      |
| MCM7-exon11-r  | CCCAAGCTTCGTAGGTCATTGTCTCGG          |
| SNRPA-exon3-r  | CCCAAGCTTCGGGACAGGCCCTG              |
| RBM33-exon9-r  | CCCAAGCTTCTTGAACAGGCGTGACCA          |
| SF3B2-exon10-r | CCCAAGCTTCTTAAAAGCCTCAAAGATCCTCT     |

**Supplementary Table 4. siRNA sequence.**

| Targeted gene name | Strand    | Sequence 5' - 3'     |
|--------------------|-----------|----------------------|
| siEIF4A3           | sense     | CGAGCAAUCAAGCAGAUCA  |
|                    | antisense | UGAUCUGCUUGAUUGCUCG  |
| siALKBH5#1         | sense     | CUGAGAACUACUGGCGCAA  |
|                    | antisense | UUGCGCCAGUAGUUCUCAG  |
| siALKBH5#2         | sense     | ACAAGUACUUCUUCGGCGA  |
|                    | antisense | UCGCCGAAAGAAGUACUUGU |
| siCTRL#1           | sense     | UGGUUUACAUGUCGACUAA  |
|                    | antisense | UUAGUCGACAUGUAAACCA  |
| siCTRL#2           | sense     | UGGUUUACAUGUUGUGUGA  |
|                    | antisense | UCACACAACAUGUAAACCA  |
| siCTRL#3           | sense     | UGGUUUACAUGUUUUCUGA  |
|                    | antisense | UCAGAAAACAUGUAAACCA  |
| siCTRL#4           | sense     | UGGUUUACAUGUUUUCUA   |
|                    | antisense | UAGGAAAACAUGUAAACCA  |

# Unprocessed Scans

Supplementary Fig. 2c

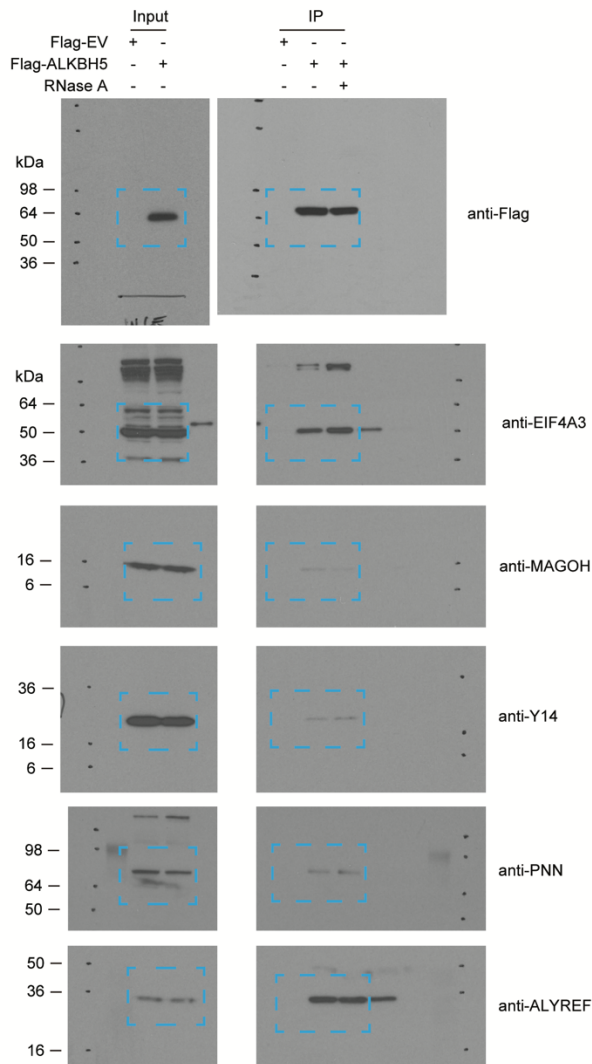

Supplementary Fig. 2d

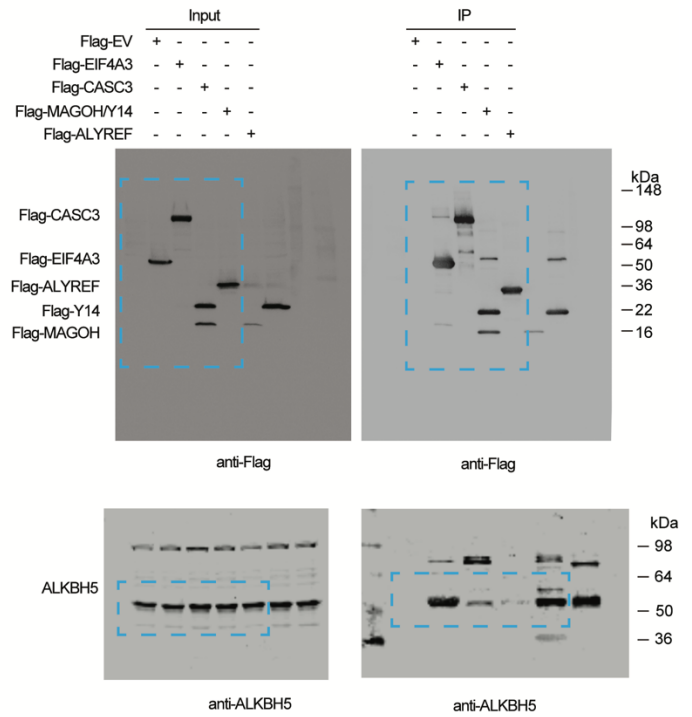

Supplementary Fig. 2e

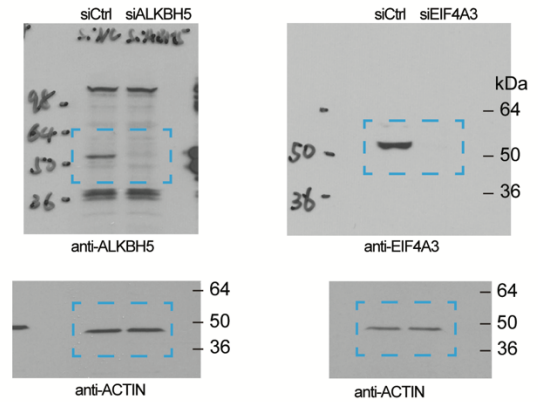

Supplementary Fig. 6c

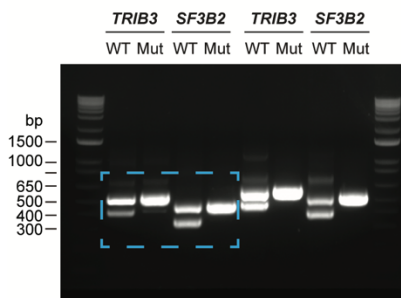

Supplementary Fig. 6d

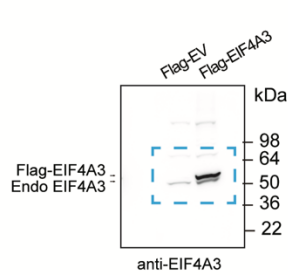

Supplementary Fig. 6e

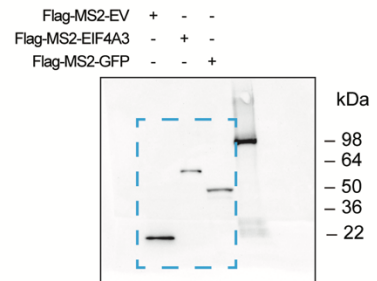

Supplement: 41467_2022_35643_MOESM1_ESM.pdf [file 41467_2022_35643_MOESM1_ESM.pdf]
