# Supplementary material for: Exon junction complex shapes the m6A epitranscriptome
Source: PubMed Central journal article supplement (PMC9780246; doi:10.1038/s41467-022-35643-1), 2022-12-23
Supplement: 41467_2022_35643_MOESM2_ESM.pdf [file 41467_2022_35643_MOESM2_ESM.pdf]

## Description of Additional Supplementary Files

File Name: Supplementary Data 1

Description: **Mass Spectrometric Analysis of ALKBH5 and FTO interacting proteins.** The list of proteins detected in IP samples from FLAG-ALKBH5, and FLAG-FTO cells. Total peptide number was used to identify potential interacting proteins of ALKBH5 or FTO.
